# Supplementary material
Source: PubMed Central journal article supplement (PMC10528069)
Supplement: NIHMS1914592-supplement-1.pdf [file NIHMS1914592-supplement-1.pdf]

## ***Supplementary Information for***

### **Prolonged experimental sleep disturbance affects the inflammatory resolution pathways in healthy humans**

Larissa C. Engert<sup>1,2</sup>, Janet M. Mullington<sup>1,2</sup>, Monika Haack<sup>1,2\*</sup>

<sup>1</sup> *Department of Neurology, Beth Israel Deaconess Medical Center, Boston, MA, USA*

<sup>2</sup> *Harvard Medical School, Boston, MA, USA*

\*Corresponding author:

Monika Haack. E-mail: mhaack@bidmc.harvard.edu

#### **Contents:**

|                                                                                             |   |
|---------------------------------------------------------------------------------------------|---|
| Table S1. Formal names and CAS registry numbers of lipid mediators.....                     | 2 |
| Table S2. Lower limit of quantification (LOQ) and limit of detection (LOD) information..... | 2 |
| Table S3. Intra-assay CV, inter-assay CV, and recovery rate.....                            | 2 |
| Table S4. Daily diet composition. ....                                                      | 3 |
| Table S5. Baseline comparisons by condition and by sex. ....                                | 4 |
| Table S6. Results of generalized linear mixed model analyses. ....                          | 5 |
| Figure S1. D-series resolvins and their precursor by condition in healthy humans. ....      | 7 |
| Figure S2. E-series resolvins and their precursor by condition in healthy humans. ....      | 8 |

**Table S1. Formal names and CAS registry numbers of lipid mediators.**

| Analyte | Formal name                                                                                                                                       | CAS RN       |
|---------|---------------------------------------------------------------------------------------------------------------------------------------------------|--------------|
| 17-HDHA | 17 <i>R/S</i> -hydroxy-4 <i>Z</i> ,7 <i>Z</i> ,10 <i>Z</i> ,13 <i>Z</i> ,15 <i>E</i> ,19 <i>Z</i> -docosahexaenoic acid                           | 90780-52-2   |
| RvD1    | 7 <i>S</i> ,8 <i>R</i> ,17 <i>S</i> -trihydroxy-4 <i>Z</i> ,9 <i>E</i> ,11 <i>E</i> ,13 <i>Z</i> ,15 <i>E</i> ,19 <i>Z</i> -docosahexaenoic acid  | 872993-05-0  |
| RvD2    | 7 <i>S</i> ,16 <i>R</i> ,17 <i>S</i> -trihydroxy-4 <i>Z</i> ,8 <i>E</i> ,10 <i>Z</i> ,12 <i>E</i> ,14 <i>E</i> ,19 <i>Z</i> -docosahexaenoic acid | 810668-37-2  |
| RvD3    | 4 <i>S</i> ,11 <i>R</i> ,17 <i>S</i> -trihydroxy-5 <i>Z</i> ,7 <i>E</i> ,9 <i>E</i> ,13 <i>Z</i> ,15 <i>E</i> ,19 <i>Z</i> -docosahexaenoic acid  | 916888-47-6  |
| RvD4    | 4 <i>S</i> ,5 <i>R</i> ,17 <i>S</i> -trihydroxy-6 <i>E</i> ,8 <i>E</i> ,10 <i>Z</i> ,13 <i>Z</i> ,15 <i>E</i> ,19 <i>Z</i> -docosahexaenoic acid  | 1025684-60-9 |
| RvD5    | 7 <i>S</i> ,17 <i>S</i> -dihydroxy-4 <i>Z</i> ,8 <i>E</i> ,10 <i>Z</i> ,13 <i>Z</i> ,15 <i>E</i> ,19 <i>Z</i> -docosahexaenoic acid               | 578008-43-2  |
| 18-HEPE | 18 <i>R/S</i> -hydroxy-5 <i>Z</i> ,8 <i>Z</i> ,11 <i>Z</i> ,14 <i>Z</i> ,16 <i>E</i> -eicosapentaenoic acid                                       | 141110-17-0  |
| RvE1    | 5 <i>S</i> ,12 <i>R</i> ,18 <i>R</i> -trihydroxy-6 <i>Z</i> ,8 <i>E</i> ,10 <i>E</i> ,14 <i>Z</i> ,16 <i>E</i> -eicosapentaenoic acid             | 552830-51-0  |
| RvE2    | 5 <i>S</i> ,18 <i>R</i> -dihydroxy-6 <i>E</i> ,8 <i>Z</i> ,11 <i>Z</i> ,14 <i>Z</i> ,16 <i>E</i> -eicosapentaenoic acid                           | 865532-70-3  |

**Table S2. Lower limit of quantification (LOQ) and limit of detection (LOD) information.**

| Analyte | Per plasma sample |       | Samples <LOQ, ≥LOD <sup>a</sup> |            | Samples <LOD <sup>b</sup> |            |
|---------|-------------------|-------|---------------------------------|------------|---------------------------|------------|
|         | LOQ               | LOD   | out of 180                      |            | out of 180                |            |
|         | pg/ml             | pg/ml | Count                           | Percentage | Count                     | Percentage |
| 17-HDHA | 1.042             | 0.521 | —                               | —          | —                         | —          |
| RvD1    | 0.130             | 0.065 | 2                               | 1.1%       | 1                         | 0.6%       |
| RvD2    | 0.260             | 0.130 | 19                              | 11%        | 11                        | 6%         |
| RvD3    | 0.130             | 0.065 | 24                              | 13%        | 7                         | 4%         |
| RvD4    | 0.130             | 0.065 | 26                              | 14%        | 26                        | 14%        |
| RvD5    | 0.130             | 0.130 | —                               | —          | 42                        | 23%        |
| 18-HEPE | 0.521             | 0.260 | —                               | —          | —                         | —          |
| RvE1    | 0.130             | 0.065 | 16                              | 9%         | 47                        | 26%        |
| RvE2    | 0.130             | 0.065 | —                               | —          | 1                         | 0.6%       |

<sup>a</sup> Samples <LOQ, ≥LOD were left in the dataset as is.

<sup>b</sup> Samples <LOD were set to half the LOD for GLMM analysis.

**Table S3. Intra-assay CV, inter-assay CV, and recovery rate.**

| Analyte | Intra-assay CV % | Inter-assay CV % | Recovery rate % |
|---------|------------------|------------------|-----------------|
| 17-HDHA | 13.0             | 12.3             | 85.1            |
| RvD1    | 6.5              | 7.9              | 103.7           |
| RvD2    | 4.3              | 5.1              | 104.3           |
| RvD3    | 0.8              | 4.1              | 107.6           |
| RvD4    | 4.6              | 5.2              | 107.7           |
| RvD5    | 6.0              | 6.6              | 98.4            |
| 18-HEPE | 9.0              | 12.9             | 102.0           |
| RvE1    | 5.6              | 6.3              | 102.8           |
| RvE2    | N/A              | N/A              | N/A             |

**Table S4. Daily diet composition.**

| <b>Variable, mean (SD)</b>        | <b>Control</b> | <b>ESD</b>     | <b>p-value<sup>a</sup></b> |
|-----------------------------------|----------------|----------------|----------------------------|
| <b>Energy [kcal]</b>              | 2258.7 (402.1) | 2258.8 (356.3) | .997                       |
| <b>Protein [g]</b>                | 89.7 (19.2)    | 91.4 (16.3)    | .191                       |
| <b>Total lipids [g]</b>           | 76.5 (14.3)    | 76.8 (14.0)    | .807                       |
| <b>Carbohydrate, by diff. [g]</b> | 318.1 (56.1)   | 315.6 (49.6)   | .534                       |
| <b>Calcium, Ca [mg]</b>           | 752.9 (268.6)  | 734.9 (285.0)  | .386                       |
| <b>Phosphorus, P [mg]</b>         | 1196.0 (270.7) | 1214.8 (269.6) | .354                       |
| <b>Potassium, K [mg]</b>          | 3203.0 (731.7) | 3158.2 (664.6) | .394                       |
| <b>Sodium, Na [mg]</b>            | 2985.2 (745.7) | 2974.0 (588.7) | .824                       |
| <b>Omega-3 fatty acids [g]</b>    | 1.44 (0.62)    | 1.39 (0.55)    | .218                       |
| <b>Omega-6 fatty acids [g]</b>    | 13.18 (4.58)   | 12.72 (4.46)   | .176                       |
| <b>Omega-6/Omega-3 ratio</b>      | 9.88 (3.23)    | 9.69 (3.01)    | .406                       |

<sup>a</sup> *Independent samples t-test, two-sided.*

**Table S5. Baseline comparisons by condition and by sex.**

| <b>By Condition</b><br><i>Variable, mean (SD) in pg/ml</i> | <b>Control</b> | <b>ESD</b>    | <b>p-value<sup>a</sup></b> |
|------------------------------------------------------------|----------------|---------------|----------------------------|
| <b>17-HDHA</b>                                             | 159.3 (111.0)  | 129.3 (141.4) | .123                       |
| <b>RvD1</b>                                                | 0.59 (0.47)    | 0.73 (0.41)   | .137                       |
| <b>RvD2</b>                                                | 0.94 (1.00)    | 0.68 (0.77)   | .286                       |
| <b>RvD3</b>                                                | 0.50 (0.39)    | 0.30 (0.24)   | .047                       |
| <b>RvD4</b>                                                | 0.37 (0.29)    | 0.33 (0.24)   | .847                       |
| <b>RvD5</b>                                                | 0.76 (0.71)    | 1.10 (3.74)   | .027                       |
| <b>18-HEPE</b>                                             | 135.0 (86.7)   | 301.1 (684.2) | .910                       |
| <b>RvE1</b>                                                | 1.80 (1.47)    | 0.90 (1.08)   | .029                       |
| <b>RvE2</b>                                                | 1.60 (0.99)    | 2.92 (3.83)   | .163                       |
| <b>By Sex</b><br><i>Variable, mean (SD) in pg/ml</i>       | <b>Female</b>  | <b>Male</b>   | <b>p-value<sup>a</sup></b> |
| <b>17-HDHA</b>                                             | 127.6 (66.6)   | 161.0 (164.4) | .683                       |
| <b>RvD1</b>                                                | 0.48 (0.23)    | 0.83 (0.53)   | .011                       |
| <b>RvD2</b>                                                | 0.66 (0.88)    | 0.96 (0.90)   | .109                       |
| <b>RvD3</b>                                                | 0.32 (0.27)    | 0.47 (0.39)   | .128                       |
| <b>RvD4</b>                                                | 0.25 (0.20)    | 0.45 (0.28)   | .008                       |
| <b>RvD5</b>                                                | 0.59 (0.70)    | 1.25 (3.64)   | .829                       |
| <b>18-HEPE</b>                                             | 271.3 (667.0)  | 163.5 (194.6) | .134                       |
| <b>RvE1</b>                                                | 1.43 (1.24)    | 1.29 (1.49)   | .555                       |
| <b>RvE2</b>                                                | 2.75 (3.86)    | 1.76 (1.08)   | .650                       |

<sup>a</sup> Mann-Whitney U test, two-sided.

**Table S6. Results of generalized linear mixed model analyses.**

| Variable                     | Model term            | F      | df1 | df2    | P      |     |
|------------------------------|-----------------------|--------|-----|--------|--------|-----|
| 17-HDHA (pg/ml) <sup>a</sup> | Corrected Model       | 5.758  | 12  | 42     | <0.001 |     |
|                              | Condition             | 35.648 | 1   | 52     | <0.001 | *** |
|                              | Day                   | 0.810  | 2   | 36     | 0.453  |     |
|                              | Sex                   | 1.317  | 1   | 30     | 0.260  |     |
|                              | Condition × Day       | 0.896  | 2   | 45     | 0.415  |     |
|                              | Condition × Sex       | 2.572  | 1   | 53     | 0.115  |     |
|                              | Day × Sex             | 2.212  | 2   | 37     | 0.124  |     |
|                              | Condition × Day × Sex | 2.785  | 2   | 45     | 0.072  |     |
| Baseline (pg/ml)             | 0.938                 | 1      | 86  | 0.336  |        |     |
| RvD1 (pg/ml) <sup>b</sup>    | Corrected Model       | 2.016  | 12  | 54     | 0.041  |     |
|                              | Condition             | 7.842  | 1   | 107    | 0.006  | **  |
|                              | Day                   | 0.393  | 2   | 61     | 0.677  |     |
|                              | Sex                   | 12.692 | 1   | 24     | 0.002  | **  |
|                              | Condition × Day       | 0.842  | 2   | 62     | 0.436  |     |
|                              | Condition × Sex       | 0.488  | 1   | 107    | 0.486  |     |
|                              | Day × Sex             | 1.114  | 2   | 61     | 0.335  |     |
|                              | Condition × Day × Sex | 0.214  | 2   | 61     | 0.808  |     |
| Baseline (pg/ml)             | 2.310                 | 1      | 82  | 0.132  |        |     |
| RvD2 (pg/ml) <sup>c</sup>    | Corrected Model       | 9.271  | 12  | 35     | <0.001 |     |
|                              | Condition             | 0.689  | 1   | 71     | 0.409  |     |
|                              | Day                   | 8.621  | 2   | 30     | 0.001  | **  |
|                              | Sex                   | 9.170  | 1   | 24     | 0.006  | **  |
|                              | Condition × Day       | 17.050 | 2   | 38     | <0.001 | *** |
|                              | Condition × Sex       | 3.680  | 1   | 61     | 0.060  |     |
|                              | Day × Sex             | 1.024  | 2   | 29     | 0.372  |     |
|                              | Condition × Day × Sex | 3.894  | 2   | 38     | 0.029  | *   |
| Baseline (pg/ml)             | 21.369                | 1      | 59  | <0.001 | ***    |     |
| RvD3 (pg/ml) <sup>d</sup>    | Corrected Model       | 3.447  | 12  | 61     | <0.001 |     |
|                              | Condition             | 18.541 | 1   | 105    | <0.001 | *** |
|                              | Day                   | 2.764  | 2   | 65     | 0.070  |     |
|                              | Sex                   | 0.289  | 1   | 15     | 0.599  |     |
|                              | Condition × Day       | 0.908  | 2   | 65     | 0.408  |     |
|                              | Condition × Sex       | 1.117  | 1   | 92     | 0.293  |     |
|                              | Day × Sex             | 5.869  | 2   | 65     | 0.005  | **  |
|                              | Condition × Day × Sex | 1.021  | 2   | 65     | 0.366  |     |
| Baseline (pg/ml)             | 0.981                 | 1      | 65  | 0.326  |        |     |
| RvD4 (pg/ml) <sup>d</sup>    | Corrected Model       | 3.142  | 12  | 57     | 0.002  |     |
|                              | Condition             | 19.261 | 1   | 97     | <0.001 | *** |
|                              | Day                   | 0.427  | 2   | 56     | 0.655  |     |
|                              | Sex                   | 3.608  | 1   | 23     | 0.070  |     |
|                              | Condition × Day       | 0.100  | 2   | 59     | 0.905  |     |
|                              | Condition × Sex       | 5.629  | 1   | 97     | 0.020  | *   |
|                              | Day × Sex             | 0.032  | 2   | 57     | 0.968  |     |
|                              | Condition × Day × Sex | 0.632  | 2   | 59     | 0.535  |     |
| Baseline (pg/ml)             | 0.825                 | 1      | 79  | 0.367  |        |     |
| RvD5 (pg/ml) <sup>e</sup>    | Corrected Model       | 3.673  | 12  | 57     | <0.001 |     |
|                              | Condition             | 29.243 | 1   | 80     | <0.001 | *** |
|                              | Day                   | 0.245  | 2   | 50     | 0.784  |     |
|                              | Sex                   | 7.599  | 1   | 54     | 0.008  | **  |
|                              | Condition × Day       | 0.554  | 2   | 51     | 0.578  |     |
|                              | Condition × Sex       | 2.853  | 1   | 81     | 0.095  |     |
|                              | Day × Sex             | 0.686  | 2   | 50     | 0.508  |     |
|                              | Condition × Day × Sex | 0.549  | 2   | 51     | 0.581  |     |
| Baseline (pg/ml)             | 0.117                 | 1      | 47  | 0.734  |        |     |

**Table S6 (continued)**

| Variable                            | Model term            | F      | df1 | df2   | P      |    |
|-------------------------------------|-----------------------|--------|-----|-------|--------|----|
| <b>18-HEPE (pg/ml) <sup>c</sup></b> | Corrected Model       | 4.260  | 12  | 28    | <0.001 |    |
|                                     | Condition             | 7.775  | 1   | 28    | 0.009  | ** |
|                                     | Day                   | 2.570  | 2   | 22    | 0.099  |    |
|                                     | Sex                   | 0.761  | 1   | 29    | 0.390  |    |
|                                     | Condition × Day       | 0.096  | 2   | 29    | 0.909  |    |
|                                     | Condition × Sex       | 1.863  | 1   | 28    | 0.183  |    |
|                                     | Day × Sex             | 1.274  | 2   | 22    | 0.299  |    |
|                                     | Condition × Day × Sex | 0.254  | 2   | 29    | 0.778  |    |
| Baseline (pg/ml)                    | 4.809                 | 1      | 40  | 0.034 | *      |    |
| <b>RvE1 (pg/ml) <sup>b</sup></b>    | Corrected Model       | 1.897  | 12  | 54    | 0.056  |    |
|                                     | Condition             | 0.479  | 1   | 99    | 0.490  |    |
|                                     | Day                   | 0.291  | 2   | 66    | 0.749  |    |
|                                     | Sex                   | 0.728  | 1   | 19    | 0.404  |    |
|                                     | Condition × Day       | 0.599  | 2   | 67    | 0.553  |    |
|                                     | Condition × Sex       | 1.109  | 1   | 102   | 0.295  |    |
|                                     | Day × Sex             | 0.101  | 2   | 66    | 0.904  |    |
|                                     | Condition × Day × Sex | 2.754  | 2   | 67    | 0.071  |    |
| Baseline (pg/ml)                    | 1.942                 | 1      | 91  | 0.167 |        |    |
| <b>RvE2 (pg/ml) <sup>e</sup></b>    | Corrected Model       | 2.574  | 12  | 42    | 0.012  |    |
|                                     | Condition             | 11.350 | 1   | 42    | 0.002  | ** |
|                                     | Day                   | 0.609  | 2   | 29    | 0.551  |    |
|                                     | Sex                   | 0.228  | 1   | 21    | 0.638  |    |
|                                     | Condition × Day       | 3.191  | 2   | 32    | 0.055  |    |
|                                     | Condition × Sex       | 0.500  | 1   | 39    | 0.484  |    |
|                                     | Day × Sex             | 0.647  | 2   | 30    | 0.531  |    |
|                                     | Condition × Day × Sex | 2.345  | 2   | 32    | 0.112  |    |
| Baseline (pg/ml)                    | 1.338                 | 1      | 47  | 0.253 |        |    |

<sup>a</sup> Normal distribution with identity link function

<sup>b</sup> Normal distribution with log link function

<sup>c</sup> Inverse Gaussian distribution with log link function

<sup>d</sup> Gamma distribution with log link function

<sup>e</sup> Gamma distribution with power(-1) link function

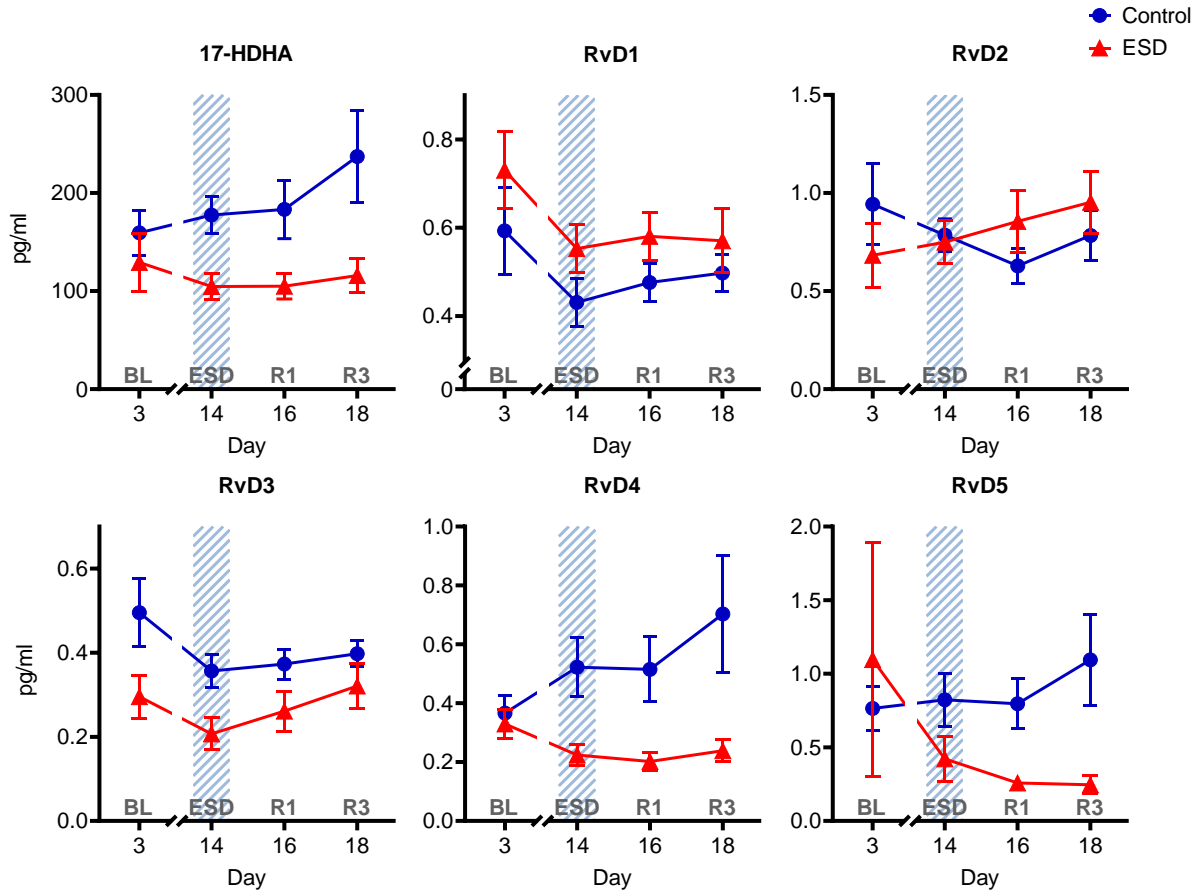

**Figure S1. D-series resolvins and their precursor by condition in healthy humans.** The graphs show original data (mean  $\pm$  SEM) of plasma concentrations in pg/ml at each time point of measurement of the precursor 17-hydroxydocosahexaenoic acid (17-HDHA) and the D-series resolvins RvD1, RvD2, RvD3, RvD4, and RvD5. Shaded area indicates ESD. Red triangles indicate ESD condition (n = 22), blue dots indicate control condition (n = 23). Blood samples were collected at baseline (day 3 = BL), during the 3<sup>rd</sup> ESD cycle (day 14 = ESD), after 1 night of recovery sleep (day 16 = R1), and after 3 nights of recovery sleep (day 18 = R3). N = 24 (12F/12M) participants in total.

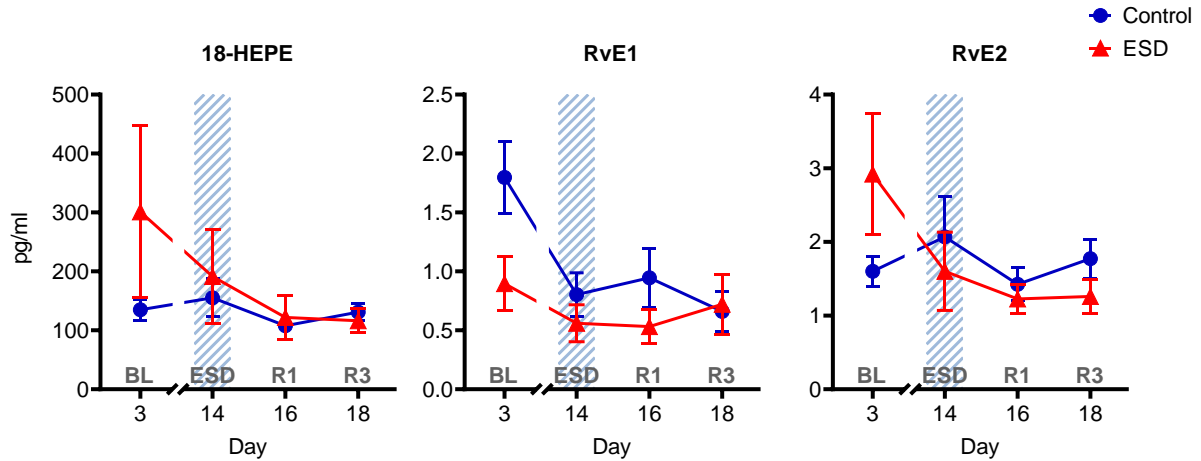

**Figure S2. E-series resolvins and their precursor by condition in healthy humans.** The graphs show original data (mean  $\pm$  SEM) of plasma concentrations in pg/ml at each time point of measurement of the precursor 18-hydroxyeicosapentaenoic acid (18-HEPE) and the E-series resolvins RvE1 and RvE2. Shaded area indicates ESD. Red triangles indicate ESD condition ( $n = 22$ ), blue dots indicate control condition ( $n = 23$ ). Blood samples were collected at baseline (day 3 = BL), during the 3<sup>rd</sup> ESD cycle (day 14 = ESD), after 1 night of recovery sleep (day 16 = R1), and after 3 nights of recovery sleep (day 18 = R3).  $N = 24$  (12F/12M) participants in total.
